# Supplementary material for: The Effects of Dietary Protein Supplementation on Exercise-Induced Inflammation and Oxidative Stress: A Systematic Review of Human Trials
Source: MDPI journal article supplement (doi:10.3390/antiox11010013), 2021-12-22
Supplement: s1 [file s1]

## Online Supplementary Material

### Search strategy

|    | Search terms                                                                                                                                                                                                                                                                                                                                                                                                                                                                                                                                                                                                                                                                                                                                                                                             | Ebsco:<br>Medline | SPORTDiscuss |
|----|----------------------------------------------------------------------------------------------------------------------------------------------------------------------------------------------------------------------------------------------------------------------------------------------------------------------------------------------------------------------------------------------------------------------------------------------------------------------------------------------------------------------------------------------------------------------------------------------------------------------------------------------------------------------------------------------------------------------------------------------------------------------------------------------------------|-------------------|--------------|
| S1 | SU (protein* or "protein supplementation") OR TI (protein* or "protein supplementation") OR AB (protein* or "protein supplementation")                                                                                                                                                                                                                                                                                                                                                                                                                                                                                                                                                                                                                                                                   | 4,593,558         | 32,989       |
| S2 | SU ("whey protein*" or "casein protein*" or "plant protein*" or "milk") OR TI ("whey protein*" or "casein protein*" or "plant protein*" or "milk") OR AB ("whey protein*" or "casein protein*" or "plant protein*" or "milk")                                                                                                                                                                                                                                                                                                                                                                                                                                                                                                                                                                            | 234,217           | 5,503        |
| S3 | SU ("Leucine*" or "BCAA" or "branch chain N3 acid*" or "hydroxymethylbutyrate" or "beta-hydroxy beta-methylbutyric acid" or "HMB*" or "taurine" or "collagen*" or "gelatin*" or "L-glutamine" or "glutamine" or "amino acid*" or "L-arginine" or "L-citrulline") OR TI ("Leucine*" or "BCAA" or "branch chain N3 acid*" or "hydroxymethylbutyrate" or "beta-hydroxy beta-methylbutyric acid" or "HMB*" or "taurine" or "collagen*" or "gelatin*" or "L-glutamine" or "glutamine" or "amino acid*" or "L-arginine" or "L-citrulline") OR AB ("Leucine*" or "BCAA" or "branch chain N3 acid*" or "hydroxymethylbutyrate" or "beta-hydroxy beta-methylbutyric acid" or "HMB*" or "taurine" or "collagen*" or "gelatin*" or "L-glutamine" or "glutamine" or "amino acid*" or "L-arginine" or "L-citrulline") | 1,338,713         | 10,570       |
| S4 | S1 OR S2 OR S3                                                                                                                                                                                                                                                                                                                                                                                                                                                                                                                                                                                                                                                                                                                                                                                           | 5,243,237         | 43,113       |
| S5 | (MH "Exercis*") OR (MH "Exercise test*")<br>(DE "EXERCISE") OR (DE "EXERCISE tests")                                                                                                                                                                                                                                                                                                                                                                                                                                                                                                                                                                                                                                                                                                                     | 214,352           | 96,588       |
| S6 | TX (eccentric N3 exercise) or (endurance N3 exercise) or (repeated sprint* N3 exercise) or (sprint* N3 exercise) or (resistance N3 exercise) or (strength N3 exercise) or (aerobic N3 exercise) or (anaerobic N3 exercise)                                                                                                                                                                                                                                                                                                                                                                                                                                                                                                                                                                               | 33,323            | 29,076       |
| S7 | TX (exercise and (muscle* N2 damage*)) OR (exercise and (muscle* N2 injury*)) OR (exercise and (muscle* soreness))                                                                                                                                                                                                                                                                                                                                                                                                                                                                                                                                                                                                                                                                                       | 6,076             | 9,054        |

|     |                                                                                                                                                                                                                      |           |         |
|-----|----------------------------------------------------------------------------------------------------------------------------------------------------------------------------------------------------------------------|-----------|---------|
| S8  | TX (exercise induced musc* damage) or<br>(eccentrically induced musc* damage*)                                                                                                                                       | 1,153     | 2,298   |
| S9  | TX EIMD                                                                                                                                                                                                              | 209       | 272     |
| S10 | TX (delayed onset N2 muscle soreness) or DOMS                                                                                                                                                                        | 10,891    | 3,170   |
| S11 | TX (musc* N3 recovery) OR (musc* N3 repair)                                                                                                                                                                          | 8,779     | 6,374   |
| S12 | TX (musc* N3 sore*) or (musc* N3 pain*) or<br>(musc* N3 damag*)                                                                                                                                                      | 33,330    | 12,950  |
| S13 | TX (exercise and ((Skeletal N2 damage*)) or<br>(exercise and (Skeletal N2 injur*)) or (exercise and<br>(Skeletal N2 soreness))                                                                                       | 555       | 413     |
| S14 | S5 OR S6 OR S7 OR S8 OR S9 OR S10 OR S11 OR<br>S12 OR S13                                                                                                                                                            | 276,083   | 131,634 |
| S15 | S4 AND S14                                                                                                                                                                                                           | 22,379    | 6,246   |
| S16 | MH "Inflammation"<br>DE "INFLAMMATION"                                                                                                                                                                               | 170,964   | 3,209   |
| S17 | TX (inflammat* N3 marker*) OR (inflammat* N3<br>response*) OR (inflammat* N3 process*) OR (anti-<br>inflammat* N3 marker*) OR (inflammation)                                                                         | 700,863   | 13,696  |
| S18 | TX (marker* N3 musc* damage) OR (marker* N3<br>musc* sore*) OR (marker* N3 musc* inflammat*)<br>OR (marker* N3 musc* injur*)                                                                                         | 1,278     | 1,527   |
| S19 | MH (Oxidative Stress) OR (Oxidative Damage)<br>DE (Oxidative Stress) OR (Oxidative Damage)                                                                                                                           | 143,670   | 3,523   |
| S20 | TX (marker* N3 oxidative stress)                                                                                                                                                                                     | 15,200    | 1,926   |
| S21 | TX (redox)                                                                                                                                                                                                           | 195,711   | 3,588   |
| S22 | TX (reactive N3 oxygen species)                                                                                                                                                                                      | 170,394   | 5,999   |
| S23 | TX (free radicals)                                                                                                                                                                                                   | 118,725   | 6,442   |
| S24 | S16 OR S17 OR S18 OR S19 OR S20 OR S21 OR<br>S22 OR S23                                                                                                                                                              | 1,138,743 | 25,095  |
| S25 | S15 AND S24                                                                                                                                                                                                          | 4,878     | 1,474   |
| S26 | TX (randomized controlled trial*) OR (RCT*)                                                                                                                                                                          | 802,276   | 44,726  |
| S27 | TX (randomi?ed control* trial*) OR TX<br>("randomi?ed N3 trial*" or "randomi?ed W3 trial*")<br>OR TX (randomly) OR TX (trial*) OR TX ("placebo<br>controlled" or "placebo N3 trial*")                                | 2,153,763 | 213,634 |
| S28 | TX ((clinic* N3 trial) or (controlled N3 trial) or<br>(comparative N3 trial) or (placebo N3 trial) or<br>(prospective N3 trial)) or TX ( (clinic* N3 study) or<br>(controlled N3 study) or (comparative N3 study) or | 4,132,308 | 187,786 |

|     |                                                                                                                                                |           |         |
|-----|------------------------------------------------------------------------------------------------------------------------------------------------|-----------|---------|
|     | (placebo N3 study) or (prospective N3 study) or (randomised N3 study))                                                                         |           |         |
| S29 | S26 OR S27 OR S28                                                                                                                              | 4,598,415 | 296,014 |
| S30 | S25 AND S29                                                                                                                                    | 1,693     | 857     |
| S31 | S30 NOT AB (mice or rats or rodents or animal)<br>NOT SU ( mice or rats or rodents or animal ) NOT<br>TI ( mice or rats or rodents or animal ) | 1,372     | 693     |

| Study ID                      | D1 | D2 | D3 | D4 | D5 | Overall |   |
|-------------------------------|----|----|----|----|----|---------|---|
| Buckley et al. (2010)         | !  | +  | +  | +  | !  | !       | + |
| Hilkens et al. (2020)         | +  | +  | +  | +  | +  | +       | ! |
| Karakus et al. (2020)         | !  | +  | +  | +  | !  | !       | ! |
| Nieman et al. (2020)          | +  | +  | +  | +  | +  | +       |   |
| Shenoy et al. (2016)          | +  | +  | +  | +  | !  | !       |   |
| Wojcik et al. (2001)          | !  | +  | +  | +  | !  | !       |   |
| Jackman et al. (2010)         | !  | +  | +  | +  | !  | !       |   |
| Ra et al. (2013)              | !  | +  | +  | +  | !  | !       |   |
| Takegaki et al. (2020)        | +  | +  | +  | +  | +  | +       |   |
| Waskiw-Ford et al. (2020)     | +  | +  | +  | +  | +  | +       |   |
| Wilson et al. (2013)          | !  | +  | +  | +  | +  | !       |   |
| Parandak et al. (2014)        | !  | +  | +  | +  | !  | !       |   |
| Sureda et al. (2009)          | !  | +  | +  | +  | !  | !       |   |
| Clifford et al. (2019)        | !  | +  | +  | +  | !  | !       |   |
| Nakhostin-Roohi et al. (2017) | !  | +  | +  | +  | !  | !       |   |
| Nemati et al. (2019)          | !  | +  | +  | +  | +  | !       |   |
| Da Silva et al. (2014)        | !  | +  | +  | +  | !  | !       |   |
| Ra et al. (2016)              | +  | +  | +  | +  | !  | !       |   |
| Zembron-Lacny et al. (2007)   | !  | +  | +  | +  | !  | !       |   |

D1 Randomisation process  
D2 Deviations from the intended interventions  
D3 Missing outcome data  
D4 Measurement of the outcome  
D5 Selection of the reported result

**Figure S1:** Risk of bias summary for individual studies with a parallel design.

| Study ID                      | D1 | DS | D2 | D3 | D4 | D5 | Overall |
|-------------------------------|----|----|----|----|----|----|---------|
| Beba et al. (2014)            | !  | +  | +  | +  | +  | !  | !       |
| Betts et al. (2009)           | !  | +  | +  | +  | +  | !  | !       |
| Draganidis et al. (2017)      | !  | +  | +  | +  | +  | !  | !       |
| Grubic et al. (2019)          | !  | +  | +  | +  | +  | +  | !       |
| Hall et al. (2013)            | +  | +  | +  | +  | +  | !  | !       |
| Kerasioti et al. (2013)       | !  | +  | +  | +  | +  | !  | !       |
| Kritikos et al. (2021)        | +  | +  | +  | +  | +  | !  | !       |
| Naclerio et al. (2014)        | !  | +  | +  | +  | +  | !  | !       |
| Rankin et al. (2017)          | !  | +  | +  | +  | +  | !  | !       |
| Rothschild et al. (2021)      | !  | !  | +  | +  | +  | !  | !       |
| Rowlands et al. (2016)        | !  | !  | +  | +  | +  | !  | !       |
| Wells et al. (2017)           | !  | +  | +  | +  | +  | !  | !       |
| Wells et al. (2016)           | !  | +  | +  | +  | +  | !  | !       |
| Volek et al. (2002)           | !  | +  | +  | +  | +  | !  | !       |
| Cury-Boaventura et al. (2008) | !  | +  | +  | +  | +  | !  | !       |

 Low risk  
 Some concerns  
 High risk

D1 Randomisation process  
DS Bias arising from period and carryover effects  
D2 Deviations from the intended interventions  
D3 Missing outcome data  
D4 Measurement of the outcome  
D5 Selection of the reported result

**Figure S2:** Risk of bias summary for individual studies with a crossover design.
